# Supplementary material
Source: MDPI journal article supplement (https://www.mdpi.com/2073-4352/12/11/1556)
Supplement: s1 [file s1]

## Supplementary Materials

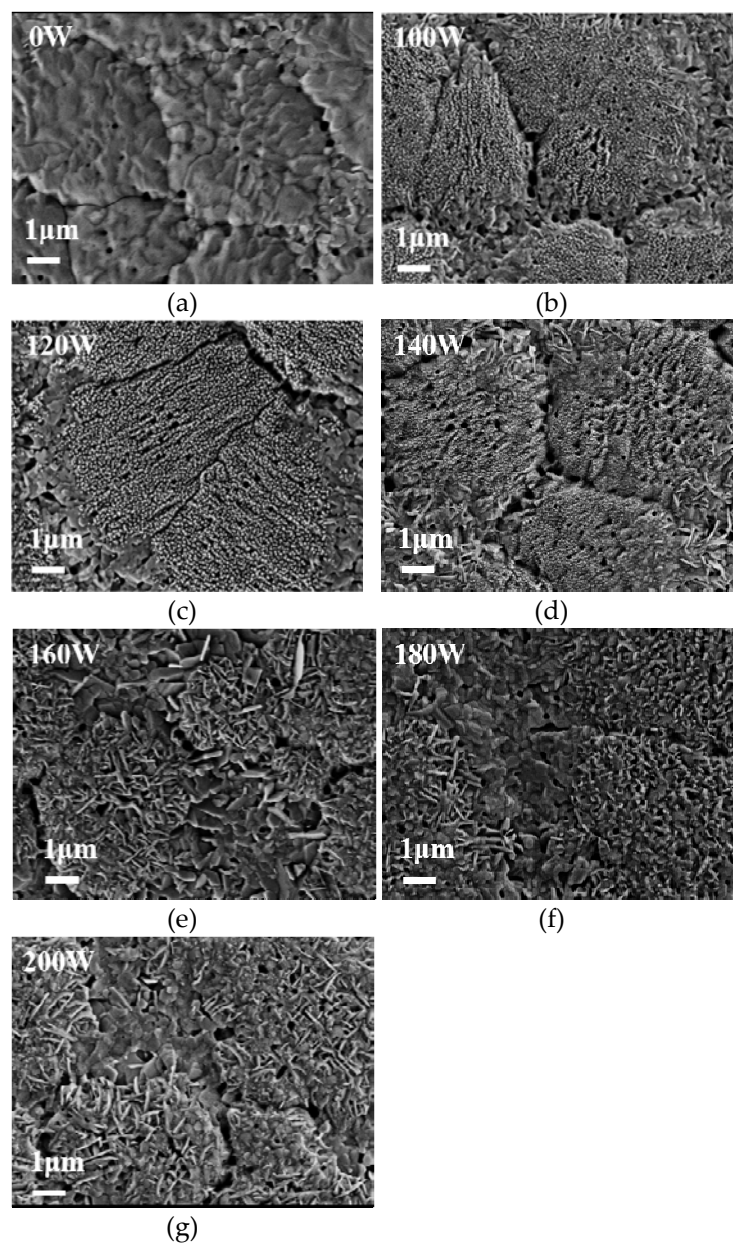

Figure S1. The surface morphologies of composited films treated by Ar plasma at different powers from (a) 0 W to (g) 200 W.
